# Supplementary material
Source: publisher figshare collection journal article supplement (https://gsapubs.figshare.com/articles/dataset/_/12749519)

Figure 1. Stratigraphic correlation chart of Mexico and parts of adjacent countries. CA—California; mbr—member; Sp—Sandstone; ls—limestone; Mz—metazone; U—Upper; B—Base; L—Lower; C—Carbon; M—Middle; Mag—Magazine Valley.

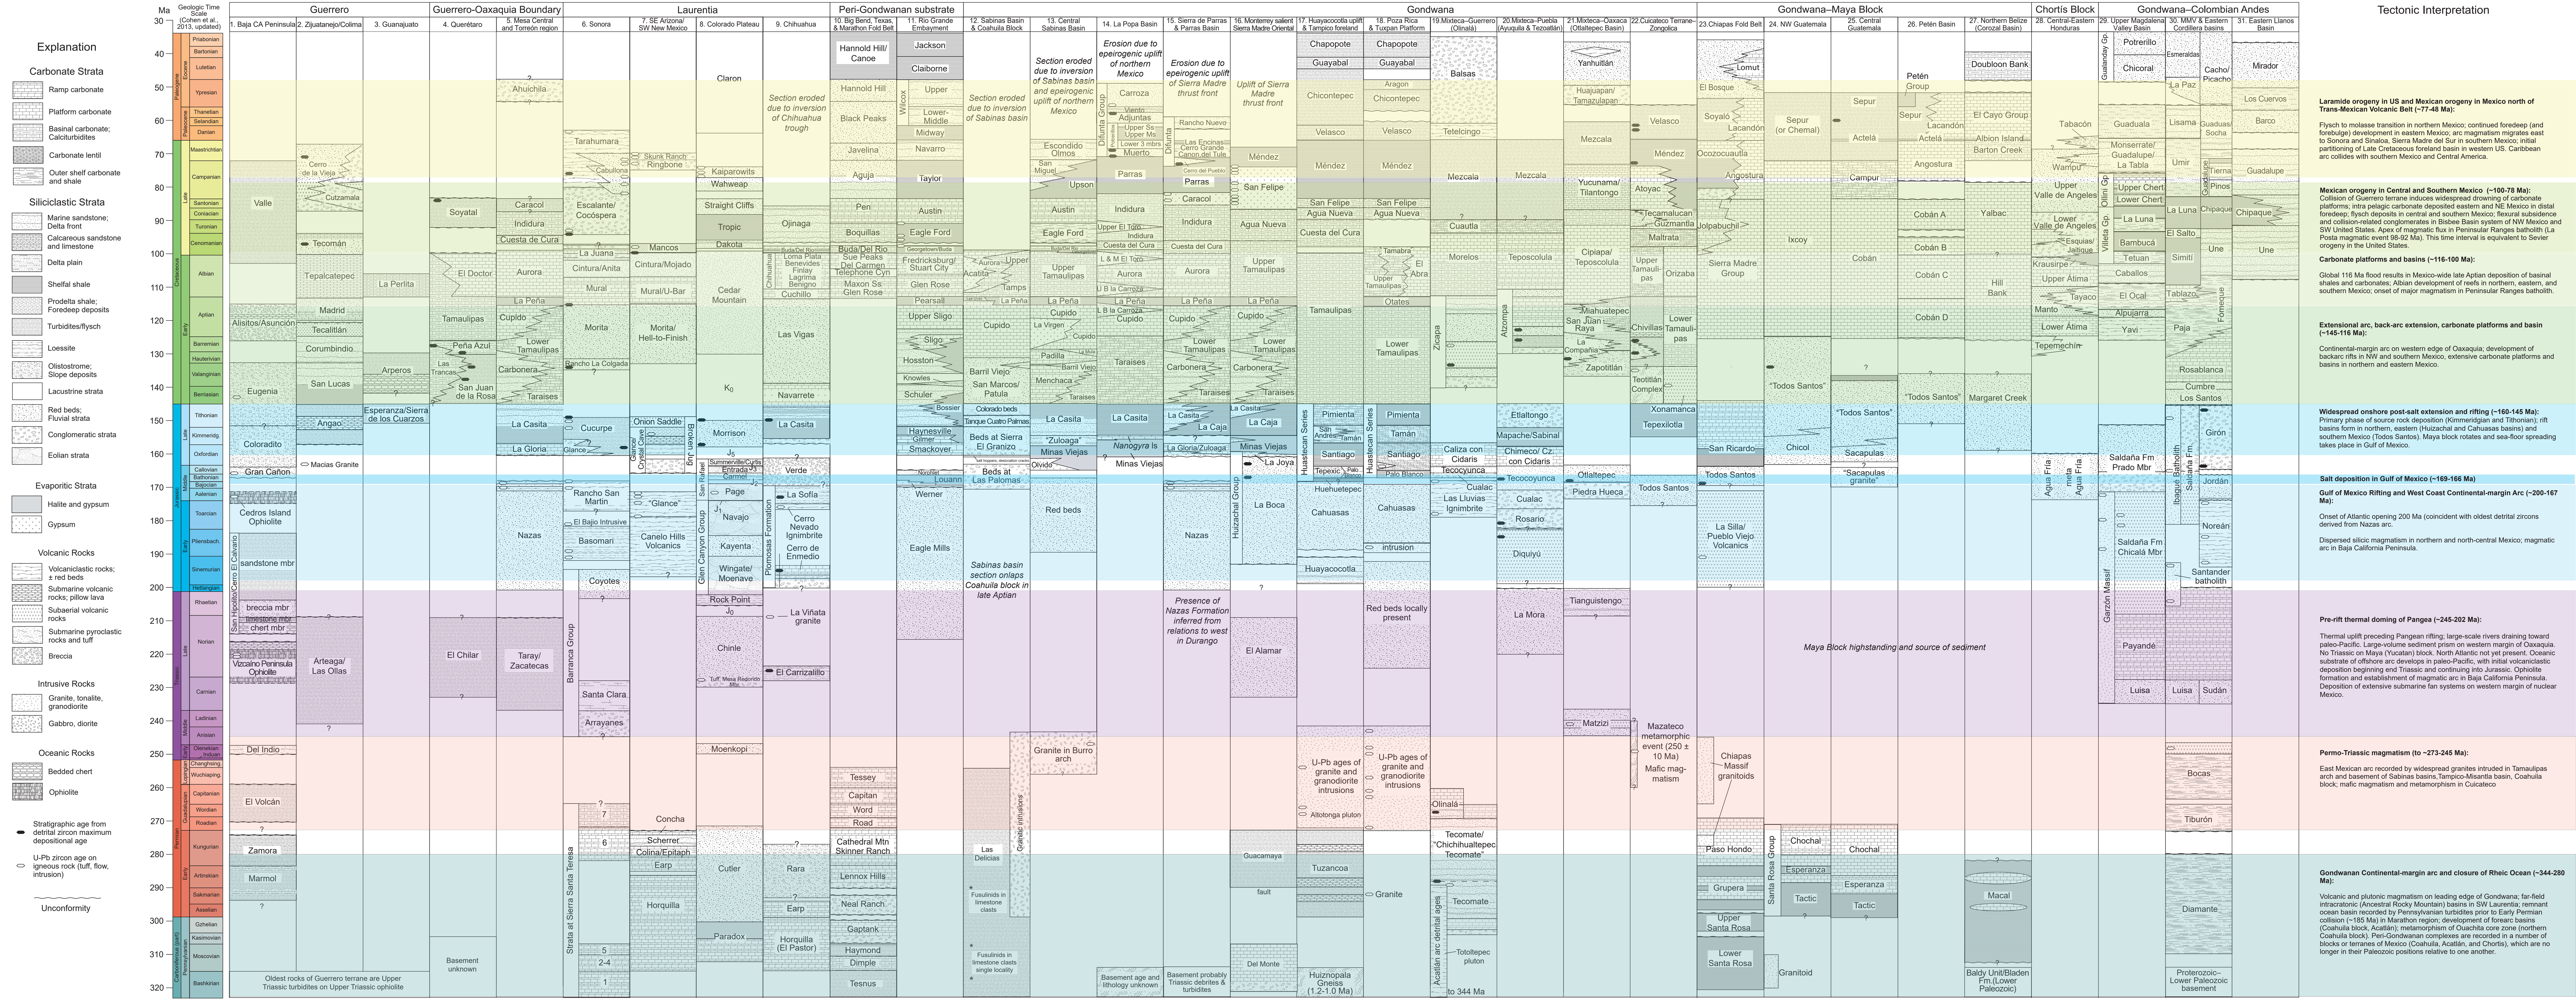

Supplement: Supplementary file 1 [file 1]
